# **Zika viruses of both African and Asian lineages cause fetal harm in a vertical transmission model**

Anna S. Jaeger<sup>1</sup>, Reyes A. Murreita<sup>2</sup>, Lea R. Goren<sup>1</sup>, Chelsea M. Crooks<sup>1</sup>, Ryan V. Moriarty<sup>3</sup>, Andrea M. Weiler<sup>3</sup>, Sierra Rybarczyk<sup>3</sup>, Matthew R. Semler<sup>4</sup>, Christopher Huffman<sup>3</sup>, Andres Mejia<sup>3</sup>, Heather A. Simmons<sup>3</sup>, Michael Fritsch<sup>4</sup>, Jorge E. Osorio<sup>1</sup>, Shelby L. O'Connor<sup>3,4</sup>, Gregory D. Ebel<sup>2</sup>, Thomas C. Friedrich<sup>1,3</sup>, and Matthew T. Aliota<sup>5</sup>

<sup>1</sup>Department of Pathobiological Sciences, University of Wisconsin-Madison.

<sup>2</sup>Arthropod-Borne and Infectious Diseases Laboratory, Department of Microbiology, Immunology and Pathology, Colorado State University.

<sup>3</sup>Wisconsin National Primate Research Center, University of Wisconsin-Madison.

<sup>4</sup>Department of Pathology and Laboratory Medicine, University of Wisconsin-Madison.

<sup>5</sup>Department of Veterinary and Biomedical Sciences, University of Minnesota.

## 1 **Abstract**

2 Congenital Zika virus (ZIKV) infection was first linked to birth defects during the American  
3 outbreak <sup>1-3</sup>. It has been proposed that mutations unique to the Asian/American-genotype  
4 explain, at least in part, the ability of Asian/American ZIKV to cause congenital Zika syndrome  
5 (CZS) <sup>4,5</sup>. Recent studies identified mutations in ZIKV infecting humans that arose coincident  
6 with the outbreak in French Polynesia and were stably maintained during subsequent spread  
7 to the Americas <sup>5</sup>. Here we show that African ZIKV can infect and harm fetuses and that the  
8 S139N mutation that has been associated with the American outbreak is not essential for fetal  
9 harm. Our findings, in a vertical transmission mouse model, suggest that ZIKV will remain a  
10 threat to pregnant women for the foreseeable future, including in Africa, southeast Asia, and  
11 the Americas. Additional research is needed to better understand the risks associated with  
12 ZIKV infection during pregnancy, both in areas where the virus is newly endemic and where it  
13 has been circulating for decades.

## 14 **Main**

15 Zika virus causes adverse pregnancy outcomes including fetal loss, developmental  
16 abnormalities, and neurological damage -- impacts that are collectively termed congenital  
17 Zika syndrome (CZS) <sup>6-9</sup>. Why does CZS seem like a new complication when ZIKV has been  
18 circulating in Africa and Asia for decades? A provocative explanation for the recent  
19 appearance of CZS is that, during their geographic spread from Asia to the Americas,  
20 contemporary ZIKV strains acquired mutations that enhance neurovirulence. In several  
21 arboviruses, simple point mutations are known to result in changes in host range and/or the  
22 efficiency of infection and replication in key amplification hosts or vectors (see <sup>10</sup> for review).  
23 For example, a single serine-to-asparagine substitution in the transmembrane protein of ZIKV

24 (prM; S139N) that is unique to the Asian/American lineage viruses is postulated to increase  
25 neurovirulence and contribute significantly to the microcephaly phenotype <sup>5</sup>.

26 Yuan et al. <sup>5</sup> recently demonstrated that S139N substantially increased ZIKV infectivity in both  
27 human and mouse neural progenitor cells (NPCs), leading to restricted brain growth in an *ex-*  
28 *vivo* embryonic mouse brain model, as well as higher mortality rates in neonatal mice  
29 following intracranial (i.c.) inoculation. However, accumulating data suggest that in endemic  
30 areas, the virus has always been teratogenic <sup>11–14</sup>. The degree to which the capacity to cause  
31 fetal harm is an emergent property unique to ZIKV circulating in the Americas remains an  
32 open question.

33 To more fully characterize the range of pathogenic outcomes of congenital ZIKV infection and  
34 to assess the role of S139N on an alternate genetic background, we engineered the reverse  
35 amino acid mutation (asparagine reverted to serine at residue 139 in the viral polyprotein) into  
36 the Puerto Rican ZIKV isolate PRVABC59 (ZIKV-PR-N139S). Prior to use in mice, we  
37 assessed viral infectivity and replication of ZIKV-PR-N139S *in vitro* using Vero cells. ZIKV-  
38 PR-N139S and a control virus derived from an infectious clone bearing the wild type ZIKV-  
39 PRVABC59 consensus sequence (ZIKV-PR-IC) gave similar growth curves (Fig. 1a). These  
40 results suggest that the “reverse substitution” N139S did not have a significant effect on either  
41 infectivity or replicative capacity *in vitro*. Next, to assess whether N139S, in the context of the  
42 PRVABC59 genome, decreased mortality in the neonatal mouse model, we inoculated one-  
43 day-old BALB/c mice i.c. with 10 PFU of either ZIKV-PR-IC; ZIKV-PR-N139S; a ZIKV strain  
44 isolated in Cambodia in 2010 (ZIKV-CAM; FSS 13025); a low-passage African ZIKV strain  
45 isolated in Senegal in 1984 (ZIKV-DAK; DAK AR 41524); or, as a control, phosphate-buffered  
46 saline (PBS). Surprisingly, and in contrast to results described by Yuan et al., i.c. inoculation  
47 of both ZIKV-DAK and ZIKV-CAM resulted in 100% mortality, whereas 80% of mice  
48 succumbed to ZIKV-PR-IC and 56% to ZIKV-PR-N139S by 28 days post inoculation (dpi; Fig.

49 1b). All strains caused significant mortality (log-rank test) as compared to the PBS-inoculated  
50 controls (ZIKV-CAM, ZIKV-DAK:  $p$ -value  $< 0.0001$ ; ZIKV-PR-IC:  $p$ -value = 0.002; ZIKV-PR-  
51 N139S:  $p$ -value = 0.016). ZIKV-PR-IC and ZIKV-PR-N139S mortality rates did not significantly  
52 differ (Fisher's exact test  $p$ -value = 0.21). These results are consistent with other studies in  
53 pregnant animal models that have provided evidence of neurovirulence and fetal demise  
54 caused by ZIKV strains isolated before the American outbreak <sup>15,16</sup>.

55 The previous experiments establish the ability of each ZIKV strain tested to cause lethal  
56 infections in neonates, but direct intracranial inoculation does not fully recapitulate the events  
57 of a natural congenital infection. To better compare the abilities of these ZIKV strains to  
58 induce birth defects following vertical transmission, we used a previously established murine  
59 pregnancy model for ZIKV <sup>16,17</sup>, in which dams lacking type I interferon signaling (*Ifnar1*<sup>-/-</sup>)  
60 were crossed with wildtype sires to produce heterozygous offspring. Because they have one  
61 intact *Ifnar1* haplotype, these offspring more closely resemble the immune status of human  
62 fetuses. Time-mated dams were inoculated subcutaneously in the footpad with 10<sup>3</sup> PFU of  
63 ZIKV-PR-IC, ZIKV-PR-N139S, or ZIKV-DAK on embryonic day 7.5 (E7.5), corresponding to  
64 the mid-to-late first trimester in humans <sup>18</sup>. We omitted ZIKV-CAM in the vertical transmission  
65 experiment due to previous experiments demonstrating its ability to cause fetal harm in this  
66 model <sup>16</sup>. We collected serum samples from dams at peak viremia (2 dpi) to confirm infection  
67 and to sequence viral populations replicating *in vivo*. All dams were productively infected  
68 without significant differences in titer (Student's *t*-test) between treatment groups (PR-IC vs. -  
69 PR-N139S:  $p$ -value = 0.33,  $t$ -value = 1.03,  $df = 10$ ; -PR-IC vs. -DAK:  $p$ -value = 0.27,  $t$ -value =  
70 1.19,  $df = 9$ ; -PR-N139S vs. -DAK:  $p$ -value = 0.27,  $t$ -value = 1.19,  $df = 9$ ; Fig. 1c). Deep  
71 sequencing of virus populations replicating in maternal serum confirmed that the N139S  
72 mutation was stably maintained *in vivo* (Table 1). Dams were monitored daily for clinical signs  
73 until time of necropsy. Overt clinical signs were only evident in ZIKV-DAK-inoculated dams

74 and included hunched posture, ruffled fur, and hind limb paralysis indicative of neurotropism.  
75 All ZIKV-DAK infected dams met euthanasia criteria at time of necropsy on E14.5.

76 Next, to assess fetal outcomes, ZIKV-inoculated dams were sacrificed at E14.5 and gross  
77 examination of each conceptus (both fetus and placenta, when possible) revealed overt  
78 differences among fetuses within pregnancies and with uninfected counterparts. In general,  
79 fetuses appeared either grossly normal or abnormal, defined as being in one of the four  
80 stages of embryo resorption (Fig. 2a, c)<sup>19</sup>. At time of necropsy, we observed high rates of  
81 resorption in both ZIKV-PR-IC- and ZIKV-PR-N139S-infected pregnancies. The proportion of  
82 abnormal fetuses for the two strains did not differ significantly (53.2%, 67.3%, Fisher's exact  
83 test  $p$ -value = 0.21). In contrast, ZIKV-DAK-infected pregnancies resulted in 100% resorption  
84 of fetuses (Fig 2a). Only fetuses that appeared grossly normal were included for  
85 measurement of crown-rump length (CRL) to provide evidence for intrauterine growth  
86 restriction (IUGR). There was a modest reduction in size in grossly normal ZIKV-PR-IC  
87 fetuses. Mean CRL did not differ significantly (Student's  $t$ -test) between fetuses of ZIKV-PR-  
88 IC- or PBS-inoculated dams ( $p$ -value = 0.22,  $t$ -value = 1.23,  $df$  = 54), whereas there was a  
89 statistically significant (Student's  $t$ -test) reduction in mean CRL between fetuses whose dams  
90 were inoculated with ZIKV-PR-IC vs. ZIKV-PR-N139S ( $p$ -value < 0.0001,  $t$ -value = 5.42,  $df$  =  
91 34; Fig 2b). This lack of evidence of severe IUGR for ZIKV-PR-IC is contrary to other studies  
92 in which fetuses developed severe IUGR<sup>16,17,20</sup>; however, this may be due to differences in  
93 timing of challenge and necropsy<sup>21</sup>, virus strain, or a different standard for characterizing  
94 grossly normal fetuses compared to those in a stage of resorption at a later embryonic age.

95 To confirm vertical transmission of ZIKV to the developing conceptus, viral loads were  
96 measured from representative placentas and fetuses from each litter of all treatment groups  
97 by quantitative RT-PCR (Fig 2d-f). vRNA was detected in all fetuses and placentas that were  
98 tested. Viral loads were significantly higher (Student's  $t$ -test) in placentas than in fetuses ( $p$ -

99 value < 0.0001,  $t$ -value = 5.04,  $df$  = 95; Fig 2d-e), whereas viral loads were not significantly  
100 different between groups infected with different viruses nor among littermates within the same  
101 litter (-PR-IC vs. -PR-N139S:  $p$ -value = 0.61,  $t$ -value = 0.52,  $df$  = 17.3; -PR-IC vs. -DAK:  $p$ -  
102 value = 0.36,  $t$ -value = 0.93,  $df$  = 25.5; -PR-N139S vs. -DAK:  $p$ -value = 0.97,  $t$ -value = 0.04,  $df$   
103 = 19.2; Fig. 1c). Detection of ZIKV RNA in grossly normal fetuses does not preclude the  
104 possibility that pathology may develop later in pregnancy or even postnatally, consistent with  
105 reports from humans that the effects of *in utero* exposure may not be evident at birth <sup>22</sup>.

106 To better understand the impact of *in utero* ZIKV infection, tissues of the developing placenta  
107 and decidua were evaluated microscopically. In PBS-inoculated dams, we observed normal  
108 decidua, junctional zone, and labyrinth with normal maternal and fetal blood spaces (Fig 3a-  
109 c). In contrast, ZIKV-inoculated dams displayed varying degrees of placental pathology,  
110 including vascular injury involving maternal and/or fetal vascular spaces, infarction  
111 (obstructed blood flow), necrosis, inflammation, and hemorrhage (Fig 3d-f). There also were  
112 clear strain-specific differences in the amount of placental pathology, with ZIKV-DAK  
113 displaying the most severe histologic phenotype, consistent with gross observations (Fig 3g-  
114 i).

115 Together our data show that infection with ZIKV isolates of either the African or Asian  
116 lineages during pregnancy can lead to fetal harm, with varying levels of damage to maternal,  
117 placental, and fetal tissues, frequently including death of the developing fetus. Likewise,  
118 intracranial inoculation of neonatal mice confirmed a similar neurovirulence phenotype across  
119 ZIKV lineages. The observation that a low-passage African ZIKV isolate can cause severe  
120 fetal harm suggests that, for decades, ZIKV could have been causing pregnancy losses and  
121 birth defects, which were either undiagnosed or attributed to other causes. If this hypothesis is  
122 correct, CZS is not a new syndrome caused by a recently emerged ZIKV variant, but rather  
123 an old entity that was only recognized in the large-scale American ZIKV outbreak that began

124 in 2014-15. These results provide compelling motivation to re-evaluate hypotheses explaining  
125 the emergence of CZS. A lack of thorough surveillance, paired with myriad co-circulating  
126 febrile illnesses, make understanding both the past and current prevalence of gestational  
127 ZIKV infection and any resulting fetal outcomes in Africa challenging<sup>23-25</sup>. Recent  
128 seroprevalence studies have now identified low, but consistent circulation of ZIKV in several  
129 African countries<sup>26-29</sup>, undermining the hypothesis that herd immunity protects against CZS  
130 and indicating a large population potentially at risk. Accurate assessment of the risk posed by  
131 ZIKV infection to pregnant women and their babies in both Africa and southeast Asia should  
132 be a priority.

## 133 **Methods**

134 **Ethical approval.** This study was approved by the University of Wisconsin-Madison  
135 Institutional Animal Care and Use Committee (Animal Care and Use Protocol Number V5519).

136  
137 **Cells and Viruses.** African Green Monkey kidney cells (Vero; ATCC #CCL-81) were  
138 maintained in Dulbecco's modified Eagle medium (DMEM) supplemented with 10% fetal bovine  
139 serum (FBS; Hyclone, Logan, UT), 2 mM L-glutamine, 1.5 g/L sodium bicarbonate, 100 U/ml  
140 penicillin, 100 µg/ml of streptomycin, and incubated at 37°C in 5% CO<sub>2</sub>. *Aedes albopictus*  
141 mosquito cells (C6/36; ATCC #CRL-1660) were maintained in DMEM supplemented with 10%  
142 fetal bovine serum (FBS; Hyclone, Logan, UT), 2 mM L-glutamine, 1.5 g/L sodium bicarbonate,  
143 100 U/ml penicillin, 100 µg/ml of streptomycin, and incubated at 28°C in 5% CO<sub>2</sub>. The cell lines  
144 were obtained from the American Type Culture Collection, were not further authenticated, and  
145 were not specifically tested for mycoplasma. ZIKV strain PRVABC59 (ZIKV-PR;  
146 GenBank:KU501215), originally isolated from a traveler to Puerto Rico in 2015 with three  
147 rounds of amplification on Vero cells, was obtained from Brandy Russell (CDC, Ft. Collins, CO).  
148 ZIKV-PR served as the backbone for the reverse genetic platform developed by Weger-Lucarelli

149 et al.<sup>30</sup> upon which the single-amino acid substitution- N139S- was introduced. ZIKV strain DAK  
150 AR 41524 (ZIKV-DAK; GenBank:KX601166) was originally isolated from *Aedes luteocephalus*  
151 mosquitoes in Senegal in 1984, with a round of amplification on *Aedes pseudocutellaris* cells,  
152 followed by amplification on C6/36 cells, followed by two rounds of amplification on Vero cells,  
153 was obtained from BEI Resources (Manassas, VA). Virus stocks were prepared by inoculation  
154 onto a confluent monolayer of C6/36 mosquito cells. ZIKV strain FSS 13025 (ZIKV-CAM;  
155 GenBank:JN860885), originally isolated from a child in Cambodia in 2010 with three rounds of  
156 amplification on Vero cells, was obtained by Brandy Russell (CDC, Ft. Collins, CO). Virus stocks  
157 were prepared by inoculation onto a confluent monolayer of Vero cells.

158 **Generation of ZIKV prM mutant.** An infectious clone for ZIKV-PR was constructed as  
159 previously described<sup>30</sup>. Infectious-clone derived virus (ZIKV-PR-IC) was recovered following  
160 electroporation of *in vitro* transcribed RNA into Vero cells. To engineer the N139S mutation into  
161 the ZIKV genome, the corresponding single-amino acid substitution was introduced into the  
162 ZIKV-PR-IC using the IVA cloning method<sup>31</sup>. The infectious clone plasmids were linearized by  
163 restriction endonuclease digestion, PCR purified, and ligated with T4 DNA ligase. From the  
164 assembled fragments, capped T7 RNA transcripts were generated, and the resulting RNA was  
165 electroporated into Vero cells. Infectious virus was harvested when 50-75% cytopathic effects  
166 were observed (6 days post transfection; ZIKV-N139S). Viral supernatant then was clarified by  
167 centrifugation and supplemented to a final concentration of 20% fetal bovine serum and 10 mM  
168 HEPES prior to freezing and storage as single use aliquots. Titer was measured by plaque  
169 assay on Vero cells as described in a subsequent section. We deep sequenced all of our  
170 challenge stocks (both wildtype and infectious clone-derived viruses) to verify the expected  
171 origin and amino acid at residue 139 (see details in a section below). All ZIKV stocks had the  
172 expected amino acid at residue 139: ZIKV-PR-IC (N), ZIKV-DAK (S), ZIKV-CAM (S), ZIKV-PR-  
173 N139S (S). Importantly, no single nucleotide polymorphisms were detected at residue 139 at a



174 frequency greater than 1%, nor did we detect evidence of Dezydougou virus, an insect-specific  
175 *Negevirus* present in some ZIKV DAK AR 41524 stocks.

176 **Plaque assay.** All ZIKV screens from mouse tissue and titrations for virus quantification from  
177 virus stocks were completed by plaque assay on Vero cell cultures. Duplicate wells were  
178 infected with 0.1 ml aliquots from serial 10-fold dilutions in growth media and virus was  
179 adsorbed for one hour. Following incubation, the inoculum was removed, and monolayers were  
180 overlaid with 3 ml containing a 1:1 mixture of 1.2% oxid agar and 2X DMEM (Gibco, Carlsbad,  
181 CA) with 10% (vol/vol) FBS and 2% (vol/vol) penicillin/streptomycin. Cells were incubated at  
182 37 °C in 5% CO<sub>2</sub> for four days for plaque development. Cell monolayers then were stained with  
183 3 ml of overlay containing a 1:1 mixture of 1.2% oxid agar and 2X DMEM with 2% (vol/vol)  
184 FBS, 2% (vol/vol) penicillin/streptomycin, and 0.33% neutral red (Gibco). Cells were incubated  
185 overnight at 37 °C and plaques were counted.

186 **Viral RNA isolation.** Viral RNA was extracted from sera using the Viral Total Nucleic Acid Kit  
187 (Promega, Madison, WI) on a Maxwell 48 RSC instrument (Promega, Madison, WI). Viral RNA  
188 was isolated from homogenized tissues using the Maxwell 48 RSC Viral Total Nucleic Acid  
189 Purification Kit (Promega, Madison, WI) on a Maxwell 48 RSC instrument. Each tissue was  
190 homogenized using PBS supplemented with 20% FBS and penicillin/streptomycin and a tissue  
191 tearor variable speed homogenizer. Supernatant was clarified by centrifugation and the isolation  
192 was continued according to the Maxwell 48 RSC Viral Total Nucleic Acid Purification Kit protocol,  
193 and samples were eluted into 50 µl RNase free water. RNA was then quantified using quantitative  
194 RT-PCR. Viral load data from serum are expressed as vRNA copies/mL. Viral load data from  
195 tissues are expressed as vRNA copies/tissue.

196 **Quantitative reverse transcription PCR (QRT-PCR).** For ZIKV-PR, vRNA from serum  
197 and tissues was quantified by QRT-PCR using primers with a slight modification to those

198 described by Lanciotti et al. to accommodate African lineage ZIKV sequences<sup>32</sup>. The modified  
199 primer sequences are: forward 5'-CGYTGCCCAACACAAGG-3', reverse 5'-  
200 CACYAAYGTTCTTTTGCABACAT-3', and probe 5'-6fam-  
201 AGCCTACCTTGAYAAGCARTCAGACACYCAA-BHQ1-3'. The RT-PCR was performed using  
202 the SuperScript III Platinum One-Step Quantitative RT-PCR system (Invitrogen, Carlsbad, CA)  
203 on a LightCycler 480 instrument (Roche Diagnostics, Indianapolis, IN). The primers and probe  
204 were used at final concentrations of 600 nM and 100 nM respectively, along with 150 ng random  
205 primers (Promega, Madison, WI). Cycling conditions were as follows: 37°C for 15 min, 50°C for  
206 30 min and 95°C for 2 min, followed by 50 cycles of 95°C for 15 sec and 60°C for 1 min. Viral  
207 RNA concentration was determined by interpolation onto an internal standard curve composed  
208 of seven 10-fold serial dilutions of a synthetic ZIKV RNA fragment based on a ZIKV strain  
209 derived from French Polynesia that shares >99% similarity at the nucleotide level to the Puerto  
210 Rican strain used in the infections described in this manuscript.

211 ***In vitro* viral replication.** Six-well plates containing confluent monolayers of Vero cells were  
212 infected with virus (ZIKV-PR-IC or ZIKV-PR-N139S), in triplicate, at multiplicity of infection (MOI)  
213 of 0.01 PFU/ml. After one hour of adsorption at 37°C, the inoculum was removed and the cultures  
214 were washed three times. Fresh media were added and Vero cell cultures were incubated for  
215 5 days 37°C, with aliquots removed daily, diluted 1:10 in culture media, and stored at -80°C.  
216 Viral titers at each time point were determined by plaque titration on Vero cells and viral loads  
217 were determined by QRT-PCR.

218 **Mice.** Female *Ifnar*<sup>-/-</sup> mice on the C57BL/6 background were bred in the pathogen-free animal  
219 facilities of the University of Wisconsin-Madison Mouse Breeding Core within the School of  
220 Medicine and Public Health. Male C57BL/6 mice were purchased from Jackson Laboratories.  
221 Untimed, pregnant BALB/c mice were purchased from Charles River.

222 **Subcutaneous inoculation.** All pregnant dams were between six and eight weeks of age.  
223 Littermates were randomly assigned to infected and control groups. Matings between female  
224 *Ifnar1<sup>-/-</sup>* dams and wildtype sires were timed by checking for the presence of a vaginal plug,  
225 indicating a gestational age E0.5. At embryonic day E7.5, dams were inoculated in the left, hind  
226 foot pad with 10<sup>3</sup> PFU of ZIKV in 25 µl of sterile PBS or with 25 µl of sterile PBS alone to serve  
227 as experimental controls. All animals were closely monitored by laboratory staff for adverse  
228 reactions and signs of disease. A single sub-mandibular blood draw was performed 2 days post  
229 inoculation and serum was collected to verify viremia. Mice were were humanely euthanized  
230 and necropsied at E14.5.

231 **Mouse Necropsy.** Following inoculation with ZIKV or PBS, mice were sacrificed at E14.5.  
232 Tissues were carefully dissected using sterile instruments that were changed between each  
233 mouse to minimize possible cross contamination. For all mice, each organ/neonate was  
234 evaluated grossly *in situ*, removed with sterile instruments, placed in a sterile culture dish,  
235 photographed, and further processed to assess viral burden and tissue distribution or banked  
236 for future assays. Briefly, uterus was first removed, photographed, and then dissected to  
237 remove each individual conceptus (i.e, fetus and placenta when possible). Fetuses and  
238 placentas were either collected in PBS supplemented with 20% FBS and penicillin/streptomycin  
239 (for plaque assays) or fixed in 4% PFA for imaging. Crown-rump length was measured by  
240 tracing distance from crown of head to end of tail using ImageJ. Infection-induced resorbed  
241 fetuses (~61%) were excluded from measurement analyses because they were unlikely to  
242 survive if the pregnancy was allowed to progress to term.

243 **Histology.** Tissues were fixed in 4% paraformaldehyde for 24 hours and transferred into cold,  
244 sterile DPBS until alcohol processed and embedded in paraffin. Paraffin sections (5 µm) were  
245 stained with hematoxylin and eosin (H&E). Pathologists were blinded to gross pathological  
246 findings when tissue sections were evaluated microscopically. The degree of pathology at the

247 maternal-fetal interface was rated on a scale of 0-4: 0 – no lesions (normal); 1 – mild changes; 2  
248 – mild to moderate changes; 3 – moderate to severe changes; 4 – severe. The final scores were  
249 determined as a consensus score of three independent pathologists. For each zone in the  
250 placenta (myometrium, decidua, junctional zone, labyrinth, and chorionic plate/membranes) a  
251 ‘General’ overall score was determined, a score for the amount of ‘Inflammation’, and a score  
252 for direct ‘Vascular Injury’. The ‘General’ score was based on an interpretation of the overall  
253 histopathologic findings in each placenta, which included features of necrosis, infarction,  
254 hemorrhage, mineralization, vascular injury, and inflammation. The ‘Inflammation’ score  
255 quantified the amount of inflammation in that layer. The ‘Vascular Injury’ score assessed  
256 vascular wall injury (fibrinoid necrosis, endothelial swelling), dilatation of the vessels or spaces,  
257 and intraluminal thrombi. The myometrial layer representing the uterine wall and the chorionic  
258 plate/membranes were often not present in histologic sections and therefore meaningful  
259 comparisons between strains could not be assessed. The decidual layer (maternal in origin), the  
260 junctional zone composed of fetal giant cells and spongiotrophoblast, and the labyrinth layer  
261 (the critical layer for gas and nutrient exchange between the fetal and maternal vascular  
262 systems) were scored. Photomicrographs were obtained using a bright light microscope  
263 Olympus BX43 and Olympus BX46 (Olympus Inc., Center Valley, PA) with attached Olympus  
264 DP72 digital camera (Olympus Inc.) and Spot Flex 152 64 Mp camera (Spot Imaging), and  
265 captured using commercially available image-analysis software (cellSens DimensionR, Olympus  
266 Inc. and spot software 5.2).

267 **Intracranial inoculation.** To test ZIKV strain neurovirulence, one-day-old BALB/c mice were  
268 intracranially (ic) inoculated at the lambda point with 10 PFU of virus or PBS alone. Following ic  
269 inoculation, mice were monitored twice daily for 28 days. Average survival time and percent  
270 mortality were calculated.

271 **Deep Sequencing.** Virus populations replicating in mouse sera were sequenced in duplicate  
272 using a method adapted from Quick et. al.<sup>33</sup>. Viral RNA was isolated from mouse sera using the  
273 Maxwell 16 Total Viral Nucleic Acid Purification kit, according to manufacturer's protocol. Viral  
274 RNA then was subjected to RT-PCR using the SuperScript IV Reverse Transcriptase enzyme  
275 (Invitrogen, Carlsbad, CA). Input viral RNA was 10<sup>6</sup> viral RNA templates per cDNA reaction. For  
276 sera from mice infected with ZIKV-PR-IC and ZIKV-PR-N139S, the cDNA was then split into two  
277 multi-plex PCR reactions using the PCR primers described in Quick et. al with the Q5® High-  
278 Fidelity DNA Polymerase enzyme (New England Biolabs®, Inc., Ipswich, MA). For sera from  
279 mice infected with ZIKV-DAK, the cDNA was amplified in a PCR reaction for sequencing of a  
280 single amplicon with ZIKV-DAK specific primers (forward 5'-ACCTTGCTGCCATGTTGAGA-3',  
281 reverse 5' CCGTACACAACCCAAGTCGA-3') using Q5® High-Fidelity DNA Polymerase (New  
282 England Biolabs®, Inc., Ipswich, MA). PCR products were tagged with the Illumina TruSeq  
283 Nano HT kit and sequenced with a 2 x 250 kit on an Illumina MiSeq.

284 A vial of the viral stocks used for primary challenge (ZIKV-PR-IC, ZIKV-PR-N139S, ZIKV-DAK,  
285 ZIKV-CAM), were each deep sequenced by preparing libraries of fragmented double-stranded  
286 cDNA using methods similar to those previously described<sup>34</sup>. Briefly, the sample was  
287 centrifuged at 5000 rcf for five minutes. The supernatant was then filtered through a 0.45-µm  
288 filter. Viral RNA was isolated using the QIAamp MinElute Virus Spin Kit (Qiagen, Germantown,  
289 MD), omitting carrier RNA. Eluted vRNA was then treated with DNase I. Double-stranded DNA  
290 was prepared with the Superscript Double-Stranded cDNA Synthesis kit (Invitrogen, Carlsbad,  
291 CA) and priming with random hexamers. Agencourt Ampure XP beads (Beckman Coulter,  
292 Indianapolis, IN) were used to purify double-stranded DNA. The purified DNA was fragmented  
293 with the Nextera XT kit (Illumina, Madison, WI), tagged with Illumina-compatible primers, and  
294 then purified with Agencourt Ampure XP beads. Purified libraries were then sequenced with 2 x  
295 300 bp kits on an Illumina MiSeq.

296 **Sequence analysis.** Amplicon data were analyzed using a workflow we term “Zequencer  
297 2017” (<https://bitbucket.org/dhoconno/zequencer/src>). Briefly, R1 and R2 fastq files from the  
298 paired-read Illumina miSeq dataset were merged, trimmed, and normalized using the bbtools  
299 package (<http://jgi.doe.gov/data-and-tools/bbtools>) and Seqtk (<https://github.com/lh3/seqtk>).  
300 Bbmerge.sh was used to merge reads, and to trim primer sequences by setting the forcetrimleft  
301 parameter 22. All other parameters are set to default values. These reads were then mapped to  
302 the reference amplicon sequences with BBmap.sh. Reads substantially shorter than the  
303 amplicon were filtered out by reformat.sh (the minlength parameter was set to the length of the  
304 amplicon minus 60). Seqtk was used to subsample to 1000 reads per amplicon. Quality  
305 trimming was performed on the fastq file of normalized reads by bbmap’s reformat.sh (qtrim  
306 parameter set to ‘lr’, all other parameters set to default). Novoalign  
307 (<http://www.novocraft.com/products/novoalign/>) was used to map each read to the appropriate  
308 ZIKV reference sequence: ZIKV-PRVABC59 KU501215, ZIKV DAK AR 41524 KX601166, ZIKV  
309 FSS13025 JN860885. Novoalign’s soft clipping feature was turned off by specifying the  
310 parameter “-o FullNW”. Approximate fragment length was set to 300bp, with a standard  
311 deviation of 50. We used Samtools to map, sort, and create an mpileup of our reads  
312 (<http://samtools.sourceforge.net/>). Samtools’ base alignment quality (BAQ) computation was  
313 turned off; otherwise, default settings were used. SNP calling was performed with VarScan’s  
314 mpileupcns function (<http://varscan.sourceforge.net/>). The minimum average quality was set to  
315 30; otherwise, default settings were used. VCF files were annotated using SnpEff<sup>35</sup>. Accurate  
316 calling of end-of-read SNPs are a known weakness of current alignment algorithms<sup>36</sup>; in  
317 particular, Samtools’ BAQ computation feature is known to be a source of error when using  
318 VarScan (<http://varscan.sourceforge.net/germline-calling.html>). Therefore, both Novoalign’s  
319 soft clipping feature and Samtools’ BAQ were turned off to increase the accuracy of SNP calling  
320 for SNPs occurring at the end of a read.

321 Viral stock sequences were analyzed using a modified version of the viral-ngs workflow  
322 developed by the Broad Institute (<http://viral-ngs.readthedocs.io/en/latest/description.html>)  
323 implemented in DNANexus and using bbmap local alignment in Geneious Pro (Biomatters, Ltd.,  
324 Auckland, New Zealand). Briefly, using the viral-ngs workflow, host-derived reads that map to a  
325 human sequence database and putative PCR duplicates are removed. The remaining reads  
326 were loaded into Geneious Pro and mapped to NCBI Genbank Zika virus reference sequences  
327 using bbmap local alignment. Mapped reads were aligned using Geneious global alignment and  
328 the consensus sequence was used for intrasample variant calling. Variants were called that fit  
329 the following conditions: have a minimum p-value of 10e-60, a minimum strand bias of 10e-5  
330 when exceeding 65% bias, and were nonsynonymous.

331 **Data Analysis.** All analyses, except for deep sequencing analysis, were performed using  
332 GraphPad Prism. For survival analysis, Kaplan-Meier survival curves were analyzed by the log-  
333 rank test. Unpaired Student's t-test was used to determine significant differences in virus titers,  
334 crown-rump length, and viral loads. Fisher's exact test was used to determine differences in  
335 rates of normal vs. abnormal concepti.

336 **Data Availability.** Primary data that support the findings of this study are available at the Zika  
337 Open-Research Portal (<https://zika.labkey.com>). Zika virus sequence data have been deposited  
338 in the Sequence Read Archive (SRA) with accession code SRP150883. The authors declare  
339 that all other data supporting the findings of this study are available within the article and its  
340 supplementary information files, or from the corresponding author upon request.

## 341 **References**

342 1. Mlakar, J. et al. Zika Virus Associated with Microcephaly. *N Engl J Med* **374**, 951-958  
343 (2016).



- 344 2. Rasmussen, S. A., Jamieson, D. J., Honein, M. A. & Petersen, L. R. Zika Virus and Birth  
345 Defects--Reviewing the Evidence for Causality. *N Engl J Med* **374**, 1981-1987 (2016).
- 346 3. Brasil, P. et al. Zika Virus Infection in Pregnant Women in Rio de Janeiro. *N Engl J Med*  
347 **375**, 2321-2334 (2016).
- 348 4. Pettersson, J. H. et al. How Did Zika Virus Emerge in the Pacific Islands and Latin  
349 America. *MBio* **7**, (2016).
- 350 5. Yuan, L. et al. A single mutation in the prM protein of Zika virus contributes to fetal  
351 microcephaly. *Science* **358**, 933-936 (2017).
- 352 6. Johansson, M. A., Mier-y-Teran-Romero, L., Reefhuis, J., Gilboa, S. M. & Hills, S. L. Zika  
353 and the Risk of Microcephaly. *N Engl J Med* **375**, 1-4 (2016).
- 354 7. Sarno, M. et al. Zika Virus Infection and Stillbirths: A Case of Hydrops Fetalis,  
355 Hydranencephaly and Fetal Demise. *PLoS Negl Trop Dis* **10**, e0004517 (2016).
- 356 8. Melo, A. S. et al. Congenital Zika Virus Infection: Beyond Neonatal Microcephaly. *JAMA*  
357 *Neurol* **73**, 1407-1416 (2016).
- 358 9. Nguyen, S. M. et al. Highly efficient maternal-fetal Zika virus transmission in pregnant  
359 rhesus macaques. *PLoS Pathog* **13**, e1006378 (2017).
- 360 10. Coffey, L. L., Forrester, N., Tsetsarkin, K., Vasilakis, N. & Weaver, S. C. Factors shaping  
361 the adaptive landscape for arboviruses: implications for the emergence of disease. *Future*  
362 *Microbiol* **8**, 155-176 (2013).
- 363 11. Wongsurawat, T. et al. Case of Microcephaly after Congenital Infection with Asian Lineage  
364 Zika Virus, Thailand. *Emerg Infect Dis* **24**, (2018).
- 365 12. Moi, M. L. et al. Zika virus infection and microcephaly in Vietnam. *Lancet Infect Dis* **17**,  
366 805-806 (2017).
- 367 13. Nutt, C. & Adams, P. Zika in Africa-the invisible epidemic. *Lancet* **389**, 1595-1596 (2017).
- 368 14. Honein, M. A. Recognizing the Global Impact of Zika Virus Infection during Pregnancy. *N*  
369 *Engl J Med* **378**, 1055-1056 (2018).
- 370 15. Adams Waldorf, K. M. et al. Fetal brain lesions after subcutaneous inoculation of Zika virus  
371 in a pregnant nonhuman primate. *Nat Med* **22**, 1256-1259 (2016).
- 372 16. Yockey, L. J. et al. Type I interferons instigate fetal demise after Zika virus infection. *Sci*  
373 *Immunol* **3**, (2018).
- 374 17. Miner, J. J. et al. Zika Virus Infection during Pregnancy in Mice Causes Placental Damage  
375 and Fetal Demise. *Cell* **165**, 1081-1091 (2016).
- 376 18. Sones, J. L. & Davisson, R. L. Preeclampsia, of mice and women. *Physiol Genomics* **48**,  
377 565-572 (2016).



- 378 19. Flores, L. E., Hildebrandt, T. B., Kühl, A. A. & Drews, B. Early detection and staging of  
379 spontaneous embryo resorption by ultrasound biomicroscopy in murine pregnancy.  
380 *Reprod Biol Endocrinol* **12**, 38 (2014).
- 381 20. Cugola, F. R. et al. The Brazilian Zika virus strain causes birth defects in experimental  
382 models. *Nature* **534**, 267-271 (2016).
- 383 21. Valentine, G. C. et al. Timing of gestational exposure to Zika virus is associated with  
384 postnatal growth restriction in a murine model. *Am J Obstet Gynecol* (2018).
- 385 22. van der Linden, V. et al. Description of 13 Infants Born During October 2015-January 2016  
386 With Congenital Zika Virus Infection Without Microcephaly at Birth - Brazil. *MMWR Morb*  
387 *Mortal Wkly Rep* **65**, 1343-1348 (2016).
- 388 23. Maze, M. J. et al. The epidemiology of febrile illness in sub-Saharan Africa: implications for  
389 diagnosis and management. *Clin Microbiol Infect* **24**, 808-814 (2018).
- 390 24. Sow, A. et al. Concurrent malaria and arbovirus infections in Kedougou, southeastern  
391 Senegal. *Malar J* **15**, 47 (2016).
- 392 25. Weaver, S. C. et al. Zika virus: History, emergence, biology, and prospects for control.  
393 *Antiviral Res* **130**, 69-80 (2016).
- 394 26. Herrera, B. B. et al. Continued Transmission of Zika Virus in Humans in West Africa, 1992-  
395 2016. *J Infect Dis* **215**, 1546-1550 (2017).
- 396 27. Mathé, P. et al. Low Zika virus seroprevalence among pregnant women in North Central  
397 Nigeria, 2016. *J Clin Virol* **105**, 35-40 (2018).
- 398 28. Seruyange, E. et al. Seroprevalence of Zika virus and Rubella virus IgG among blood  
399 donors in Rwanda and in Sweden. *J Med Virol* **90**, 1290-1296 (2018).
- 400 29. Sherman, K. E. et al. Zika Virus Exposure in an HIV-Infected Cohort in Ghana. *J Acquir*  
401 *Immune Defic Syndr* **78**, e35-e38 (2018).
- 402 30. Weger-Lucarelli, J. et al. Development and Characterization of Recombinant Virus  
403 Generated from a New World Zika Virus Infectious Clone. *J Virol* **91**, (2017).
- 404 31. García-Nafría, J., Watson, J. F. & Greger, I. H. IVA cloning: A single-tube universal cloning  
405 system exploiting bacterial In Vivo Assembly. *Sci Rep* **6**, 27459 (2016).
- 406 32. Lanciotti, R. S. et al. Genetic and serologic properties of Zika virus associated with an  
407 epidemic, Yap State, Micronesia, 2007. *Emerg Infect Dis* **14**, 1232-1239 (2008).
- 408 33. Quick, J. et al. Multiplex PCR method for MinION and Illumina sequencing of Zika and  
409 other virus genomes directly from clinical samples. *Nat Protoc* **12**, 1261-1276 (2017).
- 410 34. Lauck, M. et al. Discovery and full genome characterization of two highly divergent simian  
411 immunodeficiency viruses infecting black-and-white colobus monkeys (*Colobus guereza*)  
412 in Kibale National Park, Uganda. *Retrovirology* **10**, 107 (2013).

- 413 35. Cingolani, P. et al. A program for annotating and predicting the effects of single nucleotide  
414 polymorphisms, SnpEff: SNPs in the genome of *Drosophila melanogaster* strain w1118;  
415 iso-2; iso-3. *Fly (Austin)* **6**, 80-92 (2012).
- 416 36. Satya, R. V. & DiCarlo, J. Edge effects in calling variants from targeted amplicon  
417 sequencing. *BMC Genomics* **15**, 1073 (2014).

## 418 **Acknowledgements**

419 We thank Jody Peter, Victoria Leskinen, and Michelle Muhasky for maintenance of the *Ifnar1*<sup>-/-</sup>  
420 colony and assistance with timed-matings. Useful discussion with David O'Connor is greatly  
421 appreciated. Funding for this project came from National Institutes of Health grants  
422 R21AI131454, R01AI132563, R56AI132563, and start-up funds from the University of  
423 Minnesota Department of Veterinary and Biomedical Sciences to MTA; and National Institutes  
424 of Health grants R01AI067380 and R21AI125996 to GDE. RAM is supported in part by NSF  
425 training grant DGE-1450032 and by a Kirschstein National Research Service Award Individual  
426 Fellowship F31AI134108. The publication's contents are solely the responsibility of the authors  
427 and do not necessarily represent the official views of the NCRP or NIH.

## 428 **Author Contributions**

429 M.T.A., T.C.F., A.S.J., and G.D.E. designed experiments. A.S.J., T.C.F., and M.T.A. analyzed  
430 data and drafted the manuscript. G.D.E. and R.A.M. constructed the Zika virus infectious clone  
431 and engineered the mutant virus. R.A.M. and G.D.E. performed the *in vitro* viral replication  
432 experiments. A.S.J., M.T.A., and L.R.G. performed the mouse experiments. R.V.M., M.R.S.,  
433 C.M.C., and S.L.O. developed and performed the deep sequencing pipeline. A.S.J. and L.R.G.  
434 performed plaque assays. A.S.J., A.M.W., S.R., M.R.S. and C.M.C. performed viral load assays.  
435 H.A.S., A.M., M.F., and C.H. performed histological sectioning and analyses. M.T.A., J.E.O.,  
436 S.L.O, G.D.E., and T.C.F contributed space and reagents.

## 437 **Author Information**

438 Reprints and permissions information is available at [www.nature.com/reprints](http://www.nature.com/reprints).

439 The authors declare no competing financial interests.

440 Correspondence and requests for materials should be addressed to [mtaliota@umn.edu](mailto:mtaliota@umn.edu)



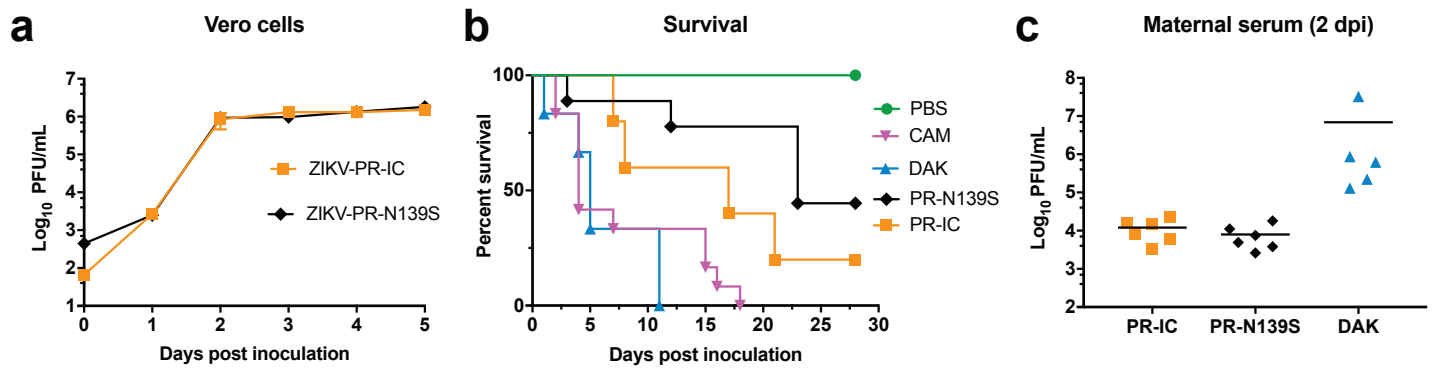

**Figure 1. In vitro and in vivo characterization of ZIKV strains. (a)** In vitro growth kinetics of ZIKV-PR-IC and mutant ZIKV-PR-N139S on Vero cells. Data points represent means of three replicates at each time point  $\pm$  standard deviation. Cells were inoculated at an MOI of 0.01 PFU/cell. Titer was measured (PFU/ml) by plaque assay. Growth curves were not significantly different. **(b)** Neurovirulence phenotypes of different strains tested in neonatal mice. Neonatal BALB/c mice were intracranially inoculated with 10 PFU of ZIKV and mortality was recorded daily for 28 days. PBS: n=8; -CAM: n=12; -PR-IC: n=5; -PR-N139S: n=9; -DAK: n=6. All strains caused significant mortality when compared to PBS (log-rank test). Mortality was not significantly different between ZIKV-PR-IC and ZIKV-PR-N139S. \*P<0.01; \*\*P<0.001; \*\*\*P<0.0001; NS, not significant. **(c)** Time-mated *Ifnar1*<sup>-/-</sup> dams were inoculated with 103 PFU of ZIKV on E7.5 and maternal infection was confirmed by plaque assay on day 2 post inoculation. Titer did not significantly differ between strains (unpaired Student's t-test).



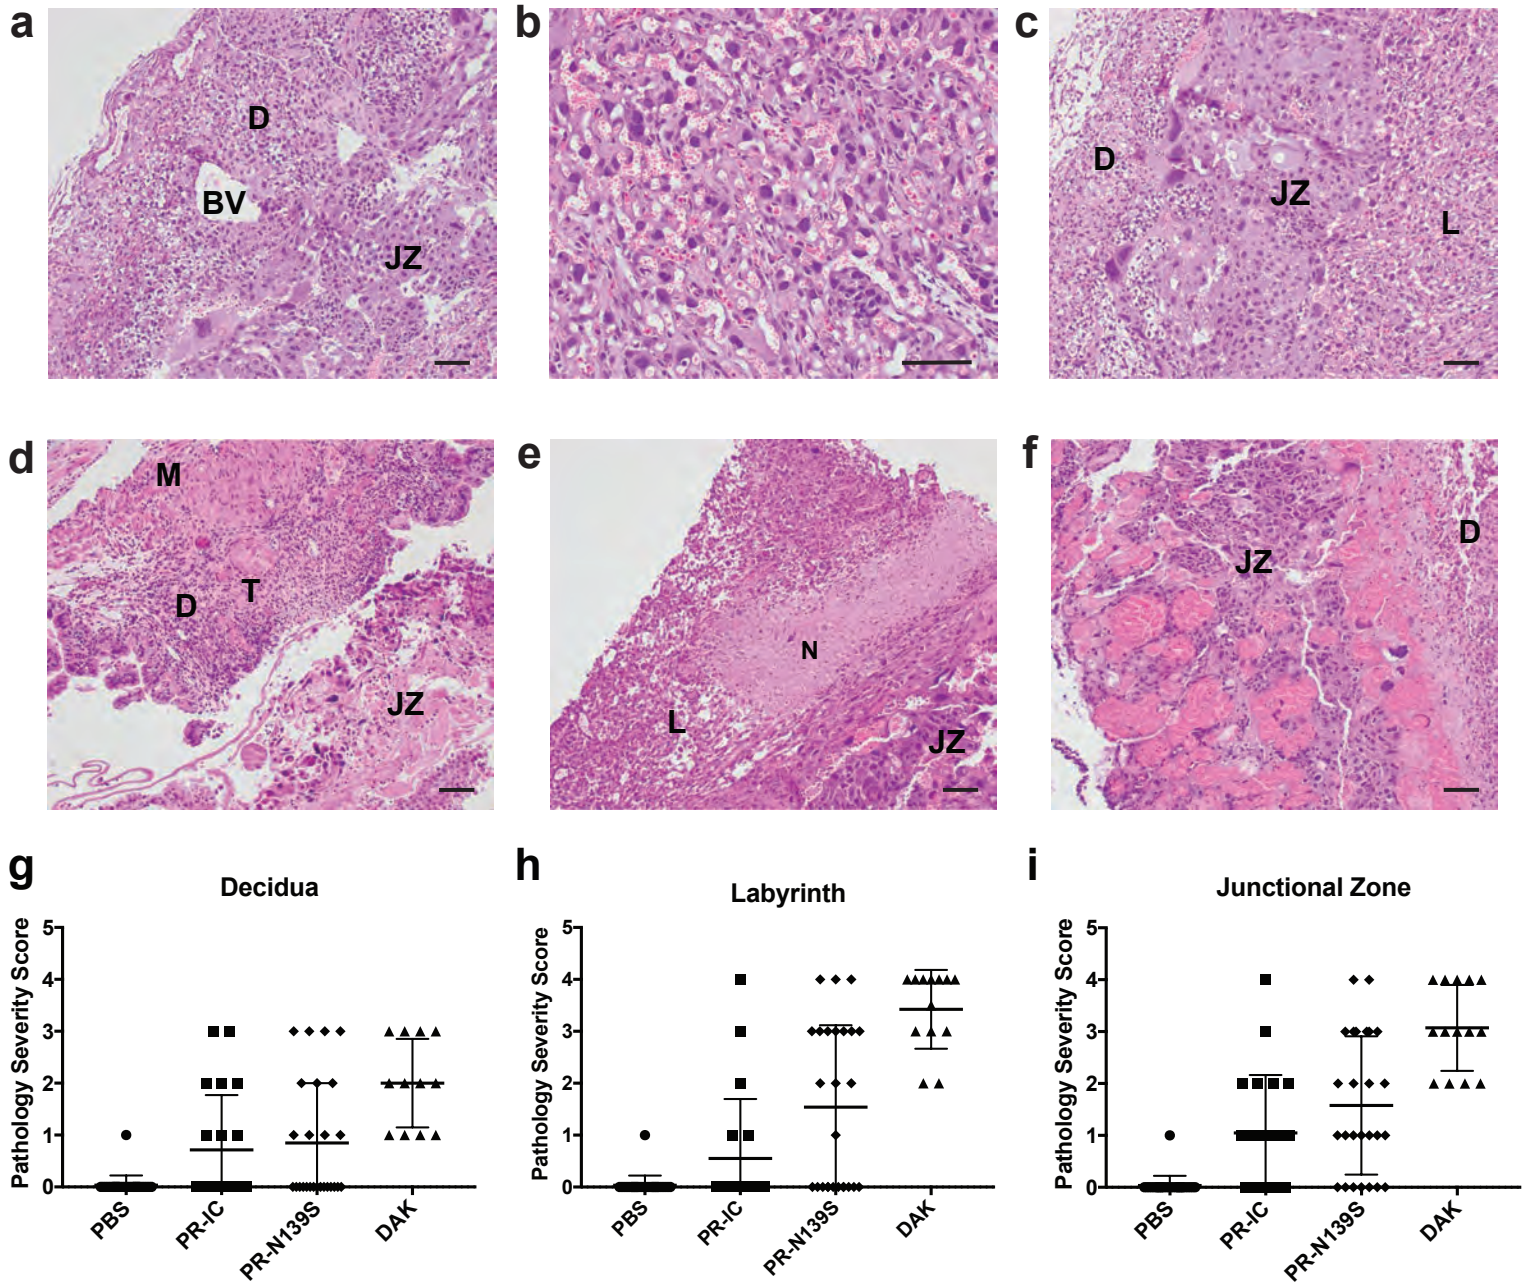

**Figure 3 | Placenta histopathology analysis: Hematoxylin and eosin (H&E) staining of placenta and fetus. (a-c)** Normal histologic features of each placental zone (decidual layer (D), labyrinth layer (L), and junctional zone (JZ)) from concepti from dams inoculated with PBS. The decidua is the maternally-derived endometrial lining of the uterus, and the fetus-derived placenta is composed of the JZ and L, where nutrient exchange occurs between the maternal and fetal blood. In L fetal blood spaces contain nucleated red blood cells and maternal spaces contain only red cells without nuclei. BV, normal decidual blood vessels. **(d-f)** Severe histopathologic injury patterns for each zone from placenta from ZIKV-inoculated dams. **(d)** Myometrium (M) and decidua (D) from a ZIKV-PR-IC placenta with increased inflammation, multiple thrombi (T) in the decidua, and a necrotic JZ. **(e)** L from a ZIKV-DAK placenta with focal necrosis (N), lack of blood in most vascular spaces, and numerous degenerating cells. **(f)** JZ from a ZIKV-DAK placenta with markedly dilated blood vessels, focal thrombi, and a layer of necrosis at the interface with the decidua. **(g-i)** The degree of placental pathology was rated on a scale of 0-4: zero represents normal histologic features and 4 represents the most severe features observed. Each zone of the placenta was scored individually for general overall pathology, amount of inflammation, and amount of vascular injury with a consensus score for each placenta derived from three independent pathologists. Only 'General' scores are shown because they were representative of the 'inflammation' and 'vascular injury' categories and do not differ significantly from 'general'. Error bars represent standard deviation of the mean. Data are representative of 3-5 independent experiments for each treatment group. Scale bar, 50  $\mu$ m.

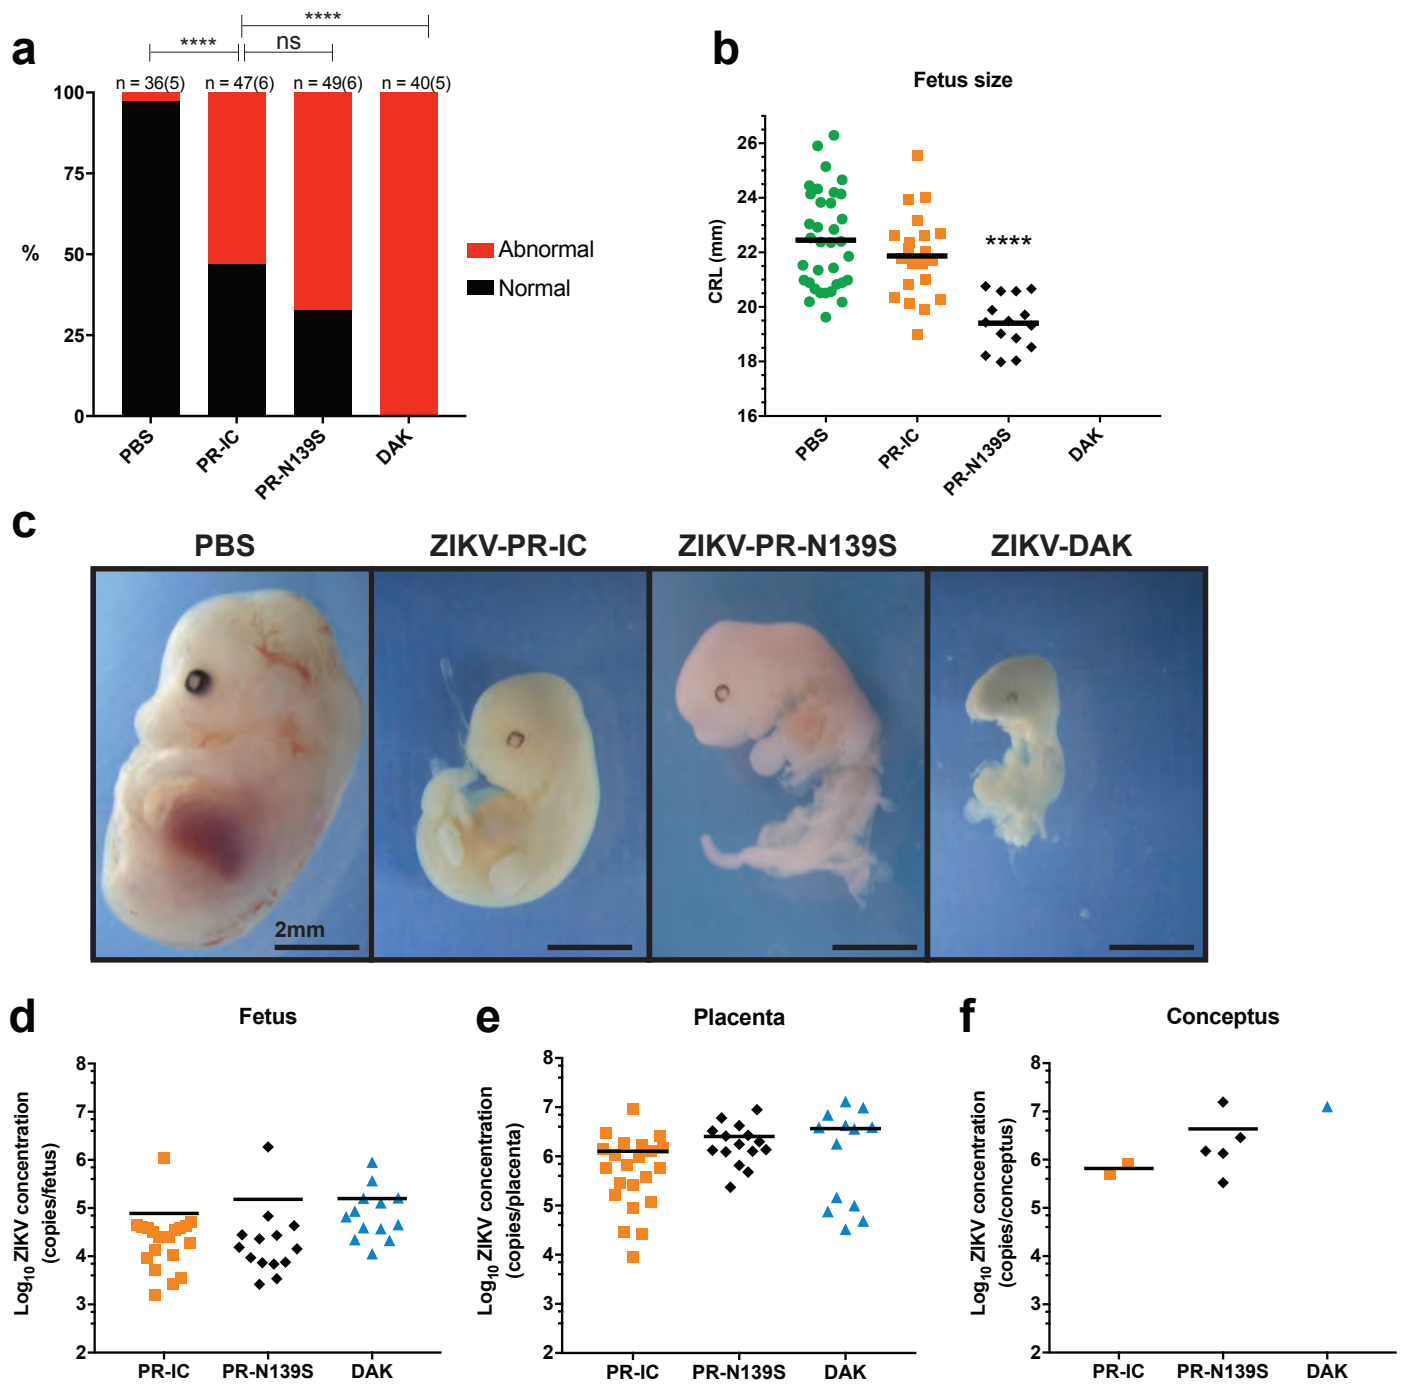

**Figure 2 | Fetal outcomes after maternal infection with ZIKV strains.** (a) Rate of grossly normal (black) versus abnormal (red) fetuses at E14.5 after maternal infection at E7.5. An abnormal fetus was defined as in any of the four stages of resorption. Data presented are for individual fetuses from 5-6 litters per treatment group. The n for each group is indicated above each bar. \*\*\*\* $P < 0.0001$ ; NS, not significant (Fisher's exact test). (b) Fetus size as assessed by crown-rump length (CRL) in mm using ImageJ software. CRL was only measured for fetuses determined to be grossly normal at E14.5. CRL of ZIKV-PR-IC fetuses did not differ significantly from PBS. There were no grossly normal fetuses for measurement from ZIKV-DAK litters. \*\*\*\* $P < 0.0001$ ; NS, not significant (unpaired Student's t-test). (c) Representative images of fetuses on E14.5 from each treatment group. Scale bar, 2 mm. PBS fetus characterized as normal. -PR-IC, -PR-N139S, -DAK fetuses characterized as abnormal. (d-f) Viral burdens were measured by qRT-PCR assay from individual homogenized placentas (d), fetuses (e), and concepti (when fetus and placenta could not be separated due to severe resorption) (f). Symbols represent individual placenta, fetus, or conceptus from 3-5 independent experiments for each treatment group. Viral burdens were not significantly different between treatment groups (unpaired Student's t-test).
